# Supplementary material for: Sex-specific incidence of asthma, rhinitis and respiratory multimorbidity before and after puberty onset: individual participant meta-analysis of five birth cohorts collaborating in MeDALL
Source: PubMed Central journal article supplement — BMJ Open Respir Res. 2019 Sep 13;6(1):e000460. doi: 10.1136/bmjresp-2019-000460 (PMC6797252; doi:10.1136/bmjresp-2019-000460), 2019-09-13
Supplement: bmjresp-2019-000460supp001.pdf [file bmjresp-2019-000460supp001.pdf]

Supplement Table 1. Dropouts per cohort by sex and follow up.

| Age | PIAMA               |                     | BAMSE                |                      | GINI-PLUS           |                     | LISA-PLUS           |                     | MAS               |                   |
|-----|---------------------|---------------------|----------------------|----------------------|---------------------|---------------------|---------------------|---------------------|-------------------|-------------------|
|     | Female<br>n/N (%)   | Male<br>n/N (%)     | Female<br>n/N (%)    | Male<br>n/N (%)      | Female<br>n/N (%)   | Male<br>n/N (%)     | Female<br>n/N (%)   | Male<br>n/N (%)     | Female<br>n/N (%) | Male<br>n/N (%)   |
| 4y  | 131/1909<br>(6.9%)  | 147/2054<br>(7.2 %) | 121/2024<br>(12.0 %) | 121/2065<br>(17.0 %) |                     |                     |                     |                     | -                 | -                 |
| 5y  | 31/1778<br>(1.7%)   | 29/1907<br>(1.5%)   |                      |                      |                     |                     |                     |                     | -                 | -                 |
| 6y  | 20/1747<br>(1.1%)   | 32/1878<br>(1.7%)   |                      |                      | 876/2839<br>(30.9%) | 951/2991<br>(31.8%) | 383/1510<br>(25.4%) | 394/1584<br>(24.9%) | 96/630<br>(15.2%) | 89/684<br>(13.0%) |
| 7y  | 28/1727<br>(1.6%)   | 31/1846<br>(1.7%)   |                      |                      |                     |                     |                     |                     | 0/534<br>(0.0%)   | 0/595<br>(0.0%)   |
| 8y  | 51/1699<br>(3.0%)   | 66/1815<br>(3.6%)   | 118/1903<br>(6.2%)   | 118/1944<br>(6.1%)   |                     |                     |                     |                     | 4/534<br>(0.8%)   | 2/595<br>(0.3%)   |
| 9y  |                     |                     |                      |                      |                     |                     |                     |                     | 0/530<br>(0.0%)   | 1/593<br>(0.2%)   |
| 10y |                     |                     |                      |                      | 135/1963<br>(6.9%)  | 157/1569<br>(10.0%) | 119/1127<br>(10.6%) | 109/1190<br>(9.2%)  | 5/530<br>(0.9%)   | 5/592<br>(0.9%)   |
| 11y | 254/1648<br>(15.4%) | 277/1749<br>(15.8%) |                      |                      |                     |                     |                     |                     | 1/525<br>(0.2%)   | 1/587<br>(0.2%)   |
| 12y |                     |                     | 53/1785<br>(3.0%)    | 51/1828<br>(2.8%)    |                     |                     |                     |                     | 33/524<br>(6.3%)  | 42/586<br>(7.2%)  |
| 13y |                     |                     |                      |                      |                     |                     |                     |                     | 5/491<br>(1.0%)   | 9/544<br>(1.7%)   |
| 14y | 240/1394<br>(17.2%) | 290/1472<br>(19.7%) |                      |                      |                     |                     |                     |                     |                   |                   |
| 15y |                     |                     |                      |                      | 109/1829<br>(6.0%)  | 113/1412<br>(8.0%)  | 62/1008<br>(6.2%)   | 60/1081<br>(5.6%)   | 28/486<br>(5.8%)  | 28/535<br>(5.2%)  |
| 16y |                     |                     | 122/1732<br>(7.0%)   | 189/1777<br>(10.6%)  |                     |                     |                     |                     |                   |                   |
| 20y |                     |                     |                      |                      |                     |                     |                     |                     | 38/458<br>(8.3%)  | 55/507<br>(10.5%) |

n= number of dropouts, N= number of total participants at earlier follow-up minus drop-outs at earlier follow-up.

Supplement Table 2. Sex-specific incidence of **asthma** in five European birth cohorts by age.

|     | PIAMA              |                      | BAMSE                |                      | GINIplus          |                   | LISA              |                   | MAS               |                  |
|-----|--------------------|----------------------|----------------------|----------------------|-------------------|-------------------|-------------------|-------------------|-------------------|------------------|
| Age | Female<br>n/N (%)  | Male<br>n/N (%)      | Female<br>n/N (%)    | Male<br>n/N (%)      | Female<br>n/N (%) | Male<br>n/N (%)   | Female<br>n/N (%) | Male<br>n/N (%)   | Female<br>n/N (%) | Male<br>n/N (%)  |
| 4y  | 119/1712<br>(7.0%) | 190/1821<br>(10.4 %) | 221/1836<br>(12.0 %) | 316/1858<br>(17.0 %) |                   |                   |                   |                   | -                 | -                |
| 5y  | 46/1577<br>(2.9%)  | 68/1625<br>(4.2%)    |                      |                      |                   |                   |                   |                   | -                 | -                |
| 6y  | 15/1520<br>(1.0%)  | 14/1547<br>(0.9%)    |                      |                      | 52/1875<br>(2.8%) | 89/1933<br>(4.6%) | 29/1068<br>(2.7%) | 41/1104<br>(3.7%) | 13/454<br>(2.9%)  | 21/504<br>(4.2%) |
| 7y  | 31/1455<br>(2.1%)  | 33/1496<br>(2.2%)    |                      |                      |                   |                   |                   |                   | 7/440<br>(1.6%)   | 9/465<br>(1.9%)  |
| 8y  | 27/1391<br>(1.9%)  | 22/1411<br>(1.6%)    | 58/1499<br>(3.9%)    | 71/1436<br>(4.9%)    |                   |                   |                   |                   | 3/424<br>(0.7%)   | 6/453<br>(1.3%)  |
| 9y  |                    |                      |                      |                      |                   |                   |                   |                   | 10/356<br>(2.8%)  | 24/363<br>(6.6%) |
| 10y |                    |                      |                      |                      | 42/1564<br>(2.7%) | 70/1569<br>(4.5%) | 13/802<br>(1.6%)  | 31/849<br>(3.7%)  | 7/351<br>(2.0%)   | 9/355<br>(2.5%)  |
| 11y | 17/1115<br>(1.5%)  | 27/1130<br>(2.4%)    |                      |                      |                   |                   |                   |                   | 1/425<br>(0.2%)   | 2/434<br>(0.5%)  |
| 12y |                    |                      | 56/1418<br>(3.9%)    | 64/1355<br>(4.7%)    |                   |                   |                   |                   | 7/303<br>(2.3%)   | 12/305<br>(3.9%) |
| 13y |                    |                      |                      |                      |                   |                   |                   |                   | 10/317<br>(3.2%)  | 9/318<br>(2.8%)  |
| 14y | 17/978<br>(1.7%)   | 17/959<br>(1.8%)     |                      |                      |                   |                   |                   |                   |                   |                  |
| 15y |                    |                      |                      |                      | 31/1467<br>(2.1%) | 37/1443<br>(2.6%) | 22/767<br>(2.9%)  | 29/814<br>(3.6%)  | 6/234<br>(2.6%)   | 4/223<br>(1.8%)  |
| 16y |                    |                      | 55/1312<br>(4.2%)    | 32/1204<br>(2.7%)    |                   |                   |                   |                   |                   |                  |
| 20y |                    |                      |                      |                      |                   |                   |                   |                   | 11/365<br>(3.0%)  | 6/366<br>(1.6%)  |

n= number of participants per analyses, N= number of total participants at time of recruitment, y= years.

Supplement Table 3. Sex-specific incidence of **rhinitis** in five European birth cohorts by age.

| Age | PIAMA               |                      | BAMSE               |                     | GINI-PLUS           |                     | LISA-PLUS           |                     | MAS               |                   |
|-----|---------------------|----------------------|---------------------|---------------------|---------------------|---------------------|---------------------|---------------------|-------------------|-------------------|
|     | Female<br>n/N (%)   | Male<br>n/N (%)      | Female<br>n/N (%)   | Male<br>n/N (%)     | Female<br>n/N (%)   | Male<br>n/N (%)     | Female<br>n/N (%)   | Male<br>n/N (%)     | Female<br>n/N (%) | Male<br>n/N (%)   |
| 4y  | 331/1714<br>(19.3%) | 428/1829<br>(23.4 %) | 180/1820<br>(9.9%)  | 233/1865<br>(12.5%) |                     |                     |                     |                     | -                 | -                 |
| 5y  | 125/1380<br>(9.1%)  | 176/1401<br>(12.6 %) |                     |                     |                     |                     |                     |                     | -                 | -                 |
| 6y  | 87/1236<br>(7.0%)   | 105/1213<br>(8.7%)   |                     |                     | 247/1894<br>(13.0%) | 346/1969<br>(17.6%) | 109/1069<br>(10.2%) | 195/1111<br>(17.6%) | 56/454<br>(12.3%) | 78/504<br>(15.5%) |
| 7y  | 61/1122<br>(5.4%)   | 77/1103<br>(7.0%)    |                     |                     |                     |                     |                     |                     | 30/400<br>(7.5%)  | 43/412<br>(10.4%) |
| 8y  | 49/1032<br>(4.7%)   | 45/990<br>(4.5%)     | 143/1527<br>(9.4%)  | 171/1508<br>(11.3%) |                     |                     |                     |                     | 36/340<br>(10.6%) | 32/345<br>(9.3%)  |
| 9y  |                     |                      |                     |                     |                     |                     |                     |                     | 23/312<br>(7.4%)  | 24/315<br>(7.6%)  |
| 10y |                     |                      |                     |                     | 194/1404<br>(13.8%) | 216/1350<br>(16.0%) | 110/741<br>(14.8%)  | 131/738<br>(17.8%)  | 21/260<br>(8.1%)  | 17/266<br>(6.4%)  |
| 11y | 61/821<br>(7.4%)    | 92/772<br>(11.9%)    |                     |                     |                     |                     |                     |                     | 18/223<br>(8.1%)  | 16/242<br>(6.6%)  |
| 12y |                     |                      | 156/1360<br>(11.5%) | 199/1324<br>(15.0%) |                     |                     |                     |                     | 17/217<br>(7.8%)  | 19/230<br>(8.3%)  |
| 13y |                     |                      |                     |                     |                     |                     |                     |                     | 5/206<br>(2.4%)   | 3/213<br>(1.4%)   |
| 14y | 90/682<br>(13.2%)   | 78/597<br>(13.1%)    |                     |                     |                     |                     |                     |                     |                   |                   |
| 15y |                     |                      |                     |                     | 218/1199<br>(18.2%) | 190/1126<br>(16.9%) | 116/654<br>(17.7%)  | 106/635<br>(16.7%)  | 11/137<br>(8.0%)  | 15/149<br>(10.1%) |
| 16y |                     |                      | 170/1175<br>(14.5%) | 168/1048<br>(16.0%) |                     |                     |                     |                     |                   |                   |
| 20y |                     |                      |                     |                     |                     |                     |                     |                     | 89/241<br>(36.9%) | 84/274<br>(30.7%) |

n= number of participants per analyses, N= number of total participants at time of recruitment, y= years.

Supplement Table 4. Sex-specific incidence of **respiratory multimorbidity** in five European birth cohorts by age.

| Age | PIAMA             |                   | BAMSE             |                   | GINI-PLUS         |                   | LISA-PLUS         |                   | MAS               |                  |
|-----|-------------------|-------------------|-------------------|-------------------|-------------------|-------------------|-------------------|-------------------|-------------------|------------------|
|     | Female<br>n/N (%) | Male<br>n/N (%)   | Female<br>n/N (%) | Male<br>n/N (%)  |
| 4y  | 51/1706<br>(3.0%) | 98/1808<br>(5.4%) | 43/1811<br>(2.4%) | 69/1843<br>(3.7%) |                   |                   |                   |                   | -                 | -                |
| 5y  | 24/1634<br>(1.5%) | 55/1705<br>(3.2%) |                   |                   |                   |                   |                   |                   | -                 | -                |
| 6y  | 9/1589<br>(0.6%)  | 14/1628<br>(0.9%) |                   |                   | 26/1868<br>(1.4%) | 40/1925<br>(2.1%) | 7/1059<br>(0.7%)  | 23/1097<br>(2.1%) | 6/454<br>(1.3%)   | 14/504<br>(2.8%) |
| 7y  | 16/1534<br>(1.0%) | 32/1589<br>(2.0%) |                   |                   |                   |                   |                   |                   | 7/447<br>(1.6%)   | 8/472<br>(1.7%)  |
| 8y  | 25/1478<br>(1.7%) | 15/1498<br>(1.0%) | 43/1649<br>(2.6%) | 53/1653<br>(3.2%) |                   |                   |                   |                   | 4/378<br>(1.1%)   | 4/395<br>(1.0%)  |
| 9y  |                   |                   |                   |                   |                   |                   |                   |                   | 6/356<br>(1.7%)   | 18/368<br>(4.9%) |
| 10y |                   |                   |                   |                   | 34/1562<br>(2.2%) | 54/1573<br>(3.4%) | 11/805<br>(1.4%)  | 28/852<br>(3.3%)  | 8/354<br>(2.3%)   | 6/362<br>(1.7%)  |
| 11y | 13/1190<br>(1.1%) | 18/1204<br>(1.5%) |                   |                   |                   |                   |                   |                   | 1/311<br>(0.3%)   | 3/339<br>(0.9%)  |
| 12y |                   |                   | 37/1567<br>(2.4%) | 64/1579<br>(4.1%) |                   |                   |                   |                   | 5/307<br>(1.6%)   | 10/317<br>(3.2%) |
| 13y |                   |                   |                   |                   |                   |                   |                   |                   | 7/295<br>(2.4%)   | 7/306<br>(2.3%)  |
| 14y | 16/1058<br>(1.5%) | 17/1043<br>(1.6%) |                   |                   |                   |                   |                   |                   |                   |                  |
| 15y |                   |                   |                   |                   | 23/1470<br>(1.6%) | 38/1472<br>(2.6%) | 16/773<br>(2.1%)  | 13/824<br>(1.6%)  | 3/237<br>(1.3%)   | 5/232<br>(2.2%)  |
| 16y |                   |                   | 58/1482<br>(3.9%) | 39/1405<br>(2.8%) |                   |                   |                   |                   |                   |                  |
| 20y |                   |                   |                   |                   |                   |                   |                   |                   | 11/378<br>(2.9%)  | 5/382<br>(1.3%)  |

n= number of participants per analyses, N= number of total participants at time of recruitment, y= years.

Supplement Table 5. Overview of included follow-up assessments of birth cohorts and available questionnaire and IgE data.

| Age | PIAMA | BAMSE | GINIplus | LISA | MAS |
|-----|-------|-------|----------|------|-----|
| 4y  | O, A  | O,A   |          |      |     |
| 5y  | O     |       |          |      | A   |
| 6y  | O     |       | O,A      | O,A  | O,A |
| 7y  | O     |       |          |      | O,A |
| 8y  | O, A  | O,A   |          |      | O   |
| 9y  |       |       |          |      | O   |
| 10y |       |       | O,A      | O,A  | O,A |
| 11y | O     |       |          |      | O   |
| 12y | A     | O     |          |      | O   |
| 13y |       |       |          |      | O,A |
| 14y | O     |       |          |      |     |
| 15y |       |       | O,A      | O,A  | O   |
| 16y |       | O,A   |          |      |     |
| 20y |       |       |          |      | O   |

O indicates available outcome data for asthma and rhinitis.

A indicates available IgE data against aero-allergens for allergic sensitization.
